# Supplementary material for: Novel Bi2O2CO3/polypyrrole/g-C3N4nanocomposites with efficient photocatalytic and nonlinear optical properties
Source: Royal Society of Chemistry journal article supplement (doi:10.1039/c6ra28346b), 2017-01-01
Supplement: c6ra28346b1.pdf [file c6ra28346b1.pdf]

## *Supplementary Information*

### **Novel Bi<sub>2</sub>O<sub>2</sub>CO<sub>3</sub>/polypyrrole/g-C<sub>3</sub>N<sub>4</sub> nanocomposites with efficient photocatalytic and nonlinear optical properties**

Wei Zhao<sup>a</sup>, Yun Wang<sup>b</sup>, Aijian Wang<sup>b,\*</sup>, Jun Qian<sup>b</sup>, Weihua Zhu<sup>b</sup>, Shengping Dou<sup>a</sup>, Qian Wang<sup>a,\*</sup>, Qin Zhong<sup>c</sup>, Aihua Chen<sup>d</sup>

<sup>a</sup> School of Energy & Power Engineering, Jiangsu University, Zhenjiang 212013, P.R. China

<sup>b</sup> School of Chemistry & Chemical Engineering, Jiangsu University, Zhenjiang 212013, P.R. China

<sup>c</sup> School of Chemical Engineering, Nanjing University of Science and Technology, Nanjing 210094, PR China

<sup>d</sup> School of Chemistry & Chemical Engineering, Yancheng Institute of Technology, Yancheng 224051, P. R. China.

Corresponding Author. E-mail: wajujs@ujs.edu.cn, qwang@ujs.edu.cn

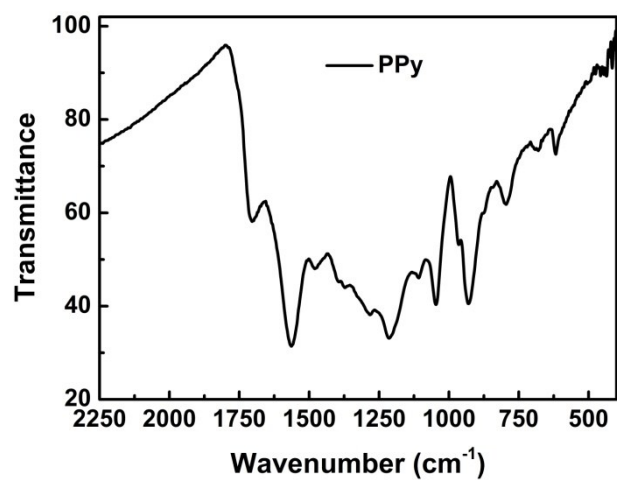

Figure S1. FTIR spectrum of PPy.

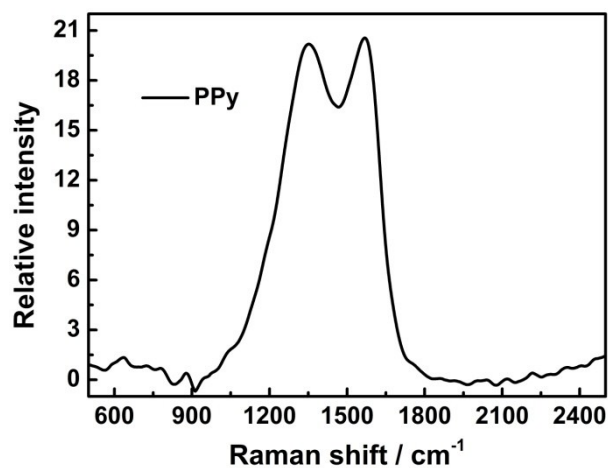

Figure S2. Raman spectrum of PPy.

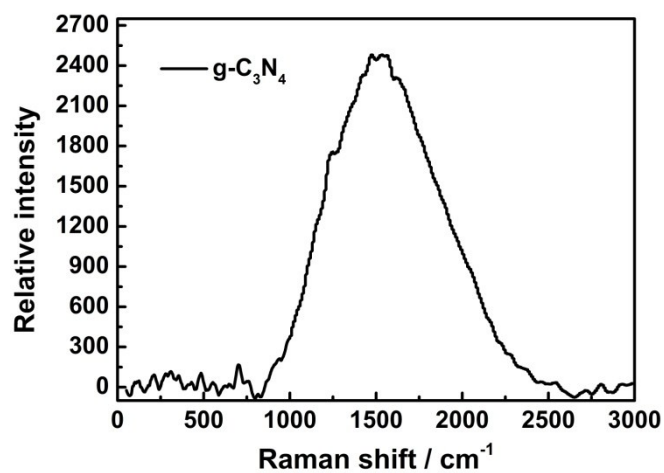

Figure S3. Raman spectrum of g-C<sub>3</sub>N<sub>4</sub>.

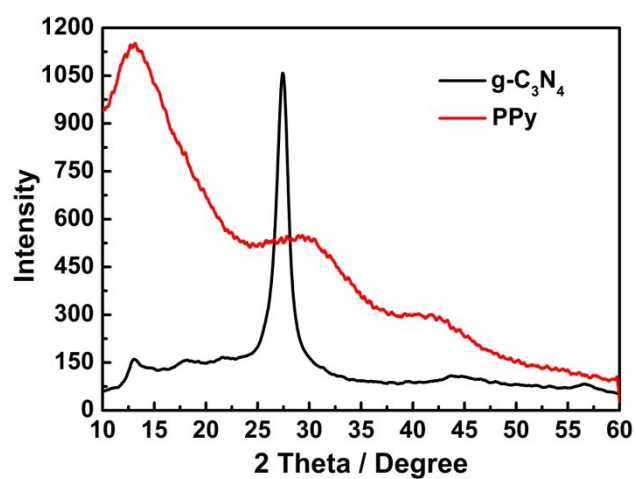

Figure S4. XRD spectra of  $g\text{-C}_3\text{N}_4$  and PPy.

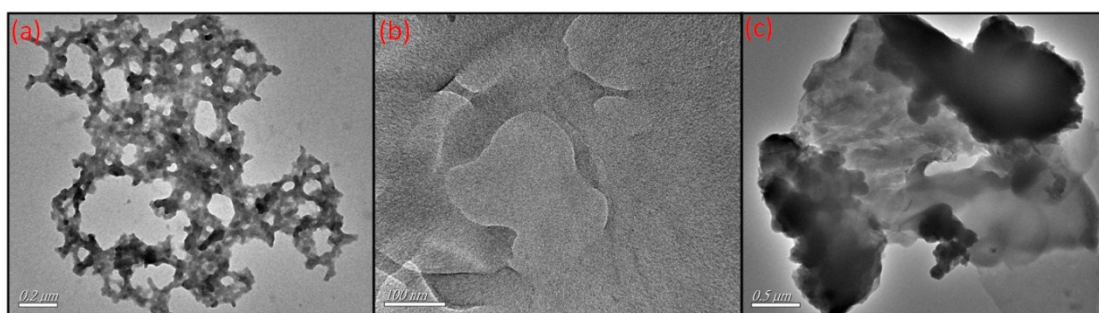

Figure S5. TEM spectra of (a) PPy, (b)  $g\text{-C}_3\text{N}_4$  and (c) B/C0.5.

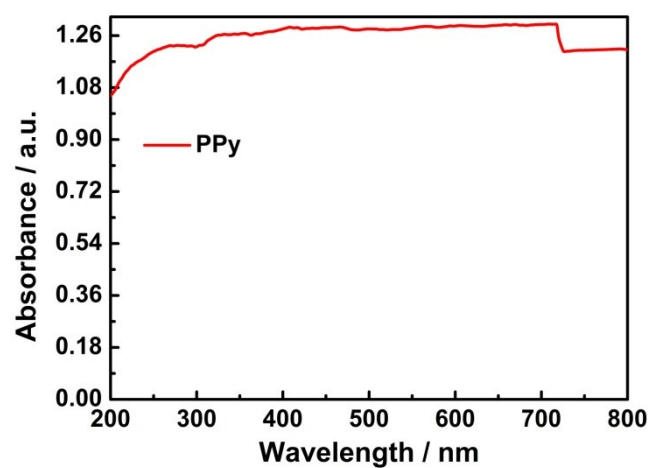

Figure S6. UV-vis diffuse reflection spectrum of PPy.
